# Supplementary material
Source: PubMed Central journal article supplement (PMC6378381)
Supplement: CEI-195-287-s001.pdf [file CEI-195-287-s001.pdf]

(a)

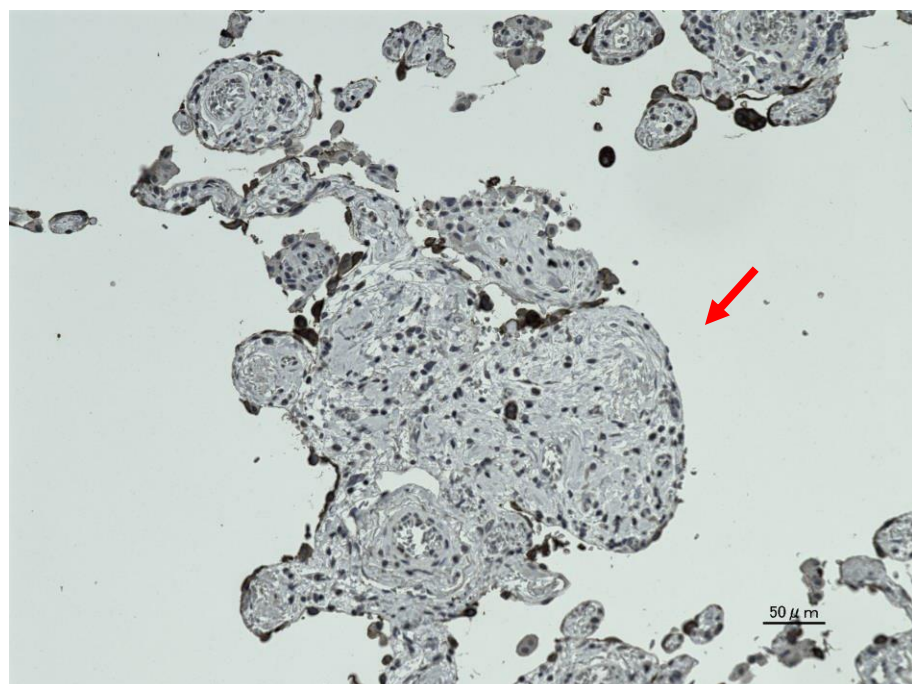

AE1/3 X200

(b)

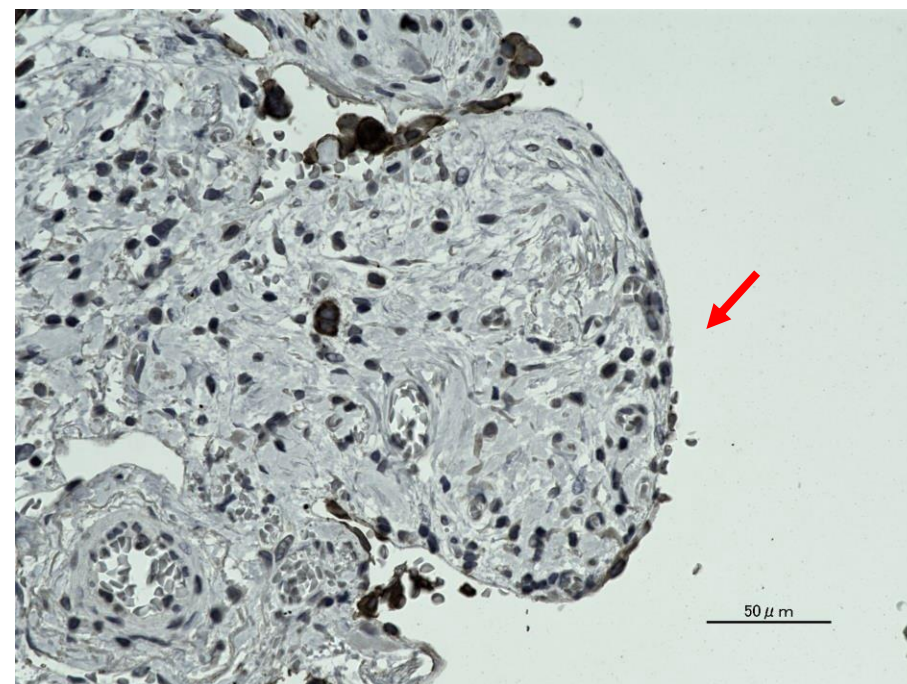

AE1/3 X400

(c)

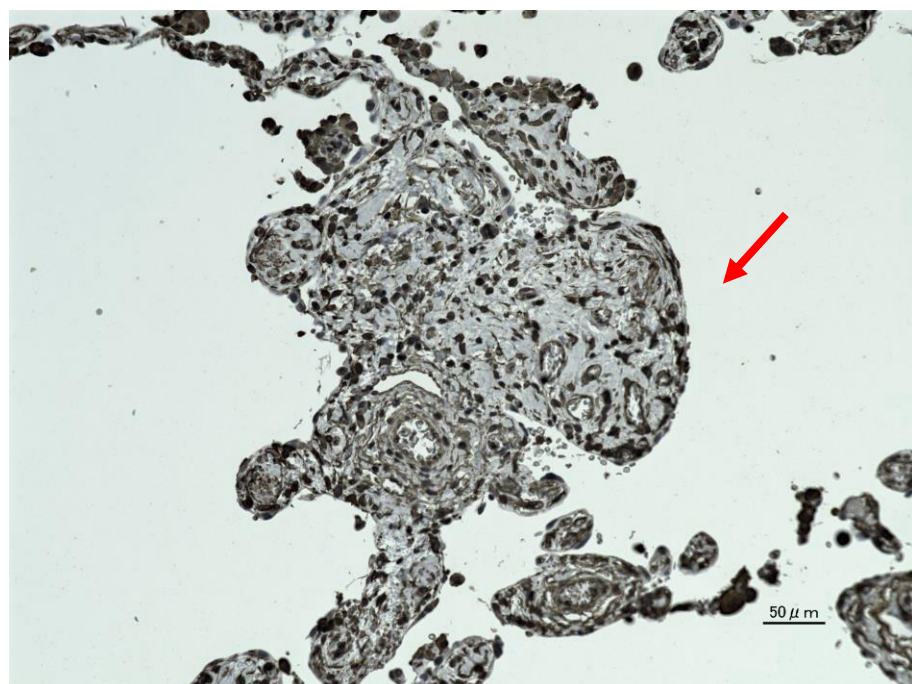

Vimentin X200

(d)

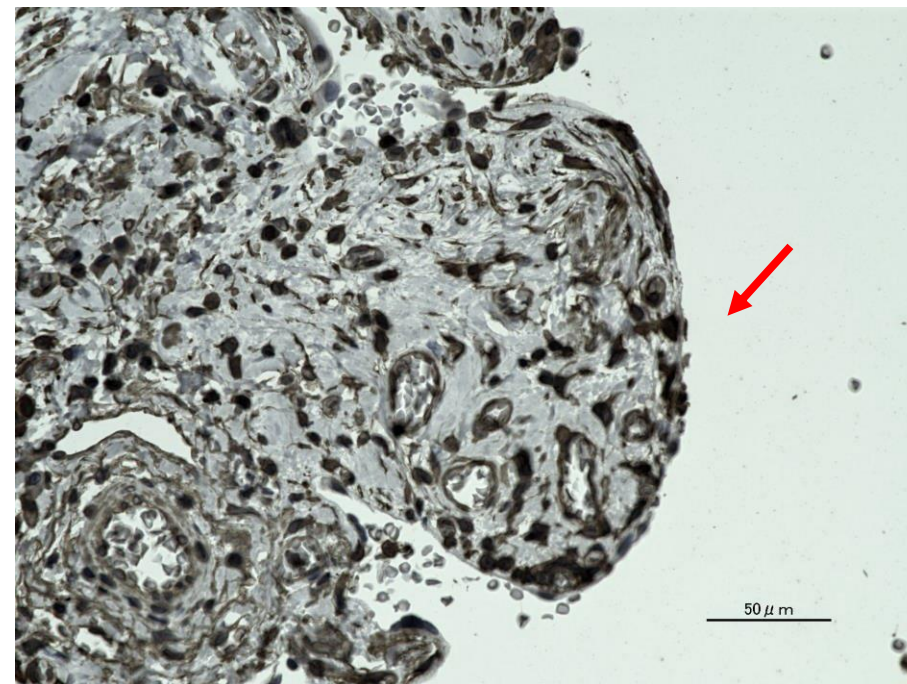

Vimentin X400

**Supplementary Figure 1. An example of mesenchymal cells directly facing the airway lumen in the human lung with fibrosis.**

After deparaffinization of lung sections followed by antigen retrieval at pH 9 for 30 min, the sections were incubated with mouse anti-cytokeratin monoclonal antibody (IgG1, clone AE1/AE3, Nichirei, Tokyo, Japan) (a, b) or anti-vimentin monoclonal antibody (IgG2a,  $\kappa$ , clone Vim 3B4, Dako, CA, USA) (c, d) at 37°C for 1 h.

The primary antibody was visualized using the Histofine Simple Stain PO kit (Nichirei) according to the manufacturer's instructions. Sections were developed with DAB, and images were captured using a fluorescent microscope BZ-X710 (Keyence, Osaka, Japan).
